# Supplementary material for: Effect of metal ion substitution on the catalytic activity of a pentanuclear metal complex
Source: Royal Society of Chemistry journal article supplement (doi:10.1039/c9dt04684d), 2020-01-01
Supplement: c9dt04684d1.pdf [file c9dt04684d1.pdf]

## Electronic Supplementary Information

### Effect of metal ion substitution on the catalytic activity of a pentanuclear metal complex

Takuya Akai,<sup>a,b,c</sup> Mio Kondo,<sup>a</sup> Sze Koon Lee,<sup>b</sup> Hitoshi Izu,<sup>a,b,c</sup> Takafumi Enomoto,<sup>b</sup> Masaya Okamura,<sup>b</sup> Yutaka Saga<sup>a</sup> and Shigeyuki Masaoka<sup>\*a</sup>

- <sup>a</sup> Division of Applied Chemistry, Graduate School of Engineering, Osaka University, Suita, Osaka 565-0871, Japan.
- <sup>b</sup> Department of life and Coordination-Complex Molecular Science, Institute for Molecular Science (IMS), 5-1 Higashiyama, Myodaiji, Okazaki, Aichi 444-8787, Japan.
- <sup>c</sup> Department of Structural Molecular Sciences, SOKENDAI [The Graduate University for Advanced Studies], Shonan village, Hayama, Kanagawa 240-0193, Japan.

E-mail: masaoka@chem.eng.osaka-u.ac.jp

## Table of Contents

|                                                         |            |
|---------------------------------------------------------|------------|
| <b>Materials and Methods</b> .....                      | <b>S3</b>  |
| <b>Materials</b> .....                                  | <b>S3</b>  |
| <b>Electrochemical studies</b> .....                    | <b>S3</b>  |
| <b>Photocatalytic reaction</b> .....                    | <b>S3</b>  |
| <sup>13</sup> CO <sub>2</sub> labelling experiment..... | <b>S4</b>  |
| <b>Synthesis</b> .....                                  | <b>S5</b>  |
| <b>Figure S1</b> .....                                  | <b>S6</b>  |
| <b>X-ray Crystallography</b> .....                      | <b>S7</b>  |
| <b>Table S1</b> .....                                   | <b>S8</b>  |
| <b>Table S2</b> .....                                   | <b>S9</b>  |
| <b>Table S3</b> .....                                   | <b>S10</b> |
| <b>Electrochemical Measurements</b> .....               | <b>S11</b> |
| <b>Figure S2</b> .....                                  | <b>S11</b> |
| <b>Controlled Potential Electrolysis</b> .....          | <b>S12</b> |
| <b>Figure S3</b> .....                                  | <b>S12</b> |
| <b>Figure S4</b> .....                                  | <b>S13</b> |
| <b>Table S4</b> .....                                   | <b>S13</b> |
| <b>Photocatalytic Experiment</b> .....                  | <b>S14</b> |
| <b>Figure S5</b> .....                                  | <b>S14</b> |
| <b>Figure S6</b> .....                                  | <b>S15</b> |
| <b>Reference</b> .....                                  | <b>S16</b> |

## Materials and Methods

### Materials

$\text{Co}(\text{CH}_3\text{COO})_2 \cdot 4\text{H}_2\text{O}$ ,  $\text{NaBF}_4$ ,  $\text{NaOH}$ ,  $\text{Ir}(\text{ppy})_3$ , aqueous solutions of  $\text{NaOH}$  and  $\text{HCl}$ , and all the solvents except for *N,N*-dimethylacetamide (DMA) were purchased from FUJIFILM Wako Pure Chemical Corporation. 3,5-Bis(2-pyridyl)pyrazole, 2-phenylbenzimidazole, tetra-*n*-butylammonium perchlorate (TBAP), methyl iodide and DMA were purchased from Tokyo Chemical Industry Co., Ltd.  $\text{NaBH}_4$  was purchased from Aldrich.  $\text{Zn}(\text{OAc})_2 \cdot 2\text{H}_2\text{O}$  was purchased from Kanto Chemical Co., Inc. All the reagents were of highest quality available and were used as received except for TBAP. TBAP was recrystallised from absolute ethanol.  $\text{H}_2\text{O}$  was purified using a Millipore MilliQ purifier. 1,3-dimethyl-2-phenyl-2,3-dihydro-1*H*-benzo[d]imidazole (BIH) was synthesized using the slightly modified procedure reported in the literature<sup>1</sup>. Synthesis of  $[\{\text{Zn}^{\text{II}}(\mu\text{-bpp})_3\}_2\text{Zn}^{\text{II}}_3(\mu\text{-OH})](\text{BF}_4)_3$  (**Zn5**( $\text{BF}_4$ )<sub>3</sub>) was performed by modifying the procedure reported in the literatures<sup>2,3</sup>.

### Electrochemical studies

Cyclic voltammetry was performed with a Bio-Logic-Science Instruments potentiostat interfaced to a computer with SP-50 software, at room temperature under Ar or  $\text{CO}_2$  using one-compartment cell with a standard three-electrode configuration, which consisted of a glassy carbon disk (diameter 3 mm, from BAS Inc.), a  $\text{Ag}/\text{Ag}^+$  couple, and a platinum wire as the working, reference and auxiliary electrodes, respectively. The working electrode was treated between scans by means of polishing with 0.05  $\mu\text{m}$  alumina paste (from BAS Inc.) and washing with purified  $\text{H}_2\text{O}$ . Ferrocene was used as an internal standard, and all potentials reported within this work are referenced to the ferrocenium/ferrocene couple at 0 V.

### Photocatalytic reaction

For a typical run, a mixed solution of DMA/TFE (17:3, v/v) (2.0 mL) containing 30  $\mu\text{M}$  **Co5**, 150  $\mu\text{M}$   $\text{Ir}(\text{ppy})_3$  and 0.10 M BIH was purged with  $\text{CO}_2$  for 15 minutes unless otherwise stated. The solution was then irradiated with a blue LED (wavelength  $\lambda = 420$  nm) at 20 °C in a custom made aluminium box with cooling system. The amount of  $\text{CO}$  and  $\text{H}_2$  produced at the headspace of the cell was quantified by a Shimadzu GC-8A with a TCD detector equipped with a packed column with Molecular Sieve 13X-S 60/80 (He carrier gas, 40 °C) and a Shimadzu GC-2014 with a TCD detector equipped with a packed column with Molecular Sieve 5A (Ar carrier gas, 40 °C). Additionally, liquid product was quantified by using a Shimadzu LC-20AD with SPD-20A and RID-10A detectors equipped with a Shim-pack

SCR102H column. Calibration curves were obtained by sampling known amounts of H<sub>2</sub>, CO, and HCOOH.

**<sup>13</sup>CO<sub>2</sub> labelling experiment.**

A mixed solution of DMA/TFE (17:3, v/v) (2.0 mL) containing 30 μM **Co5**, 150 μM Ir(ppy)<sub>3</sub> and 0.10 M BIH was purged with Ar for 15 min, followed by <sup>13</sup>CO<sub>2</sub> bubbling for 15 min. The <sup>13</sup>CO<sub>2</sub> gas was produced by adding 2.0 M HCl to solid Ba<sup>13</sup>CO<sub>3</sub> (98 atom % <sup>13</sup>C, Sigma Aldrich). The evolved CO was detected by a GCMS-QP2020 (Rt-Msieve 5A (30 m, 0.53 mm ID, 50 μm d<sub>f</sub>) He carrier gas, 40 °C).

## Synthesis

### Synthesis of $[\text{Co}^{\text{II}}_5\text{OH}(\text{bpp})_6](\text{BF}_4)_3 \cdot (\text{Co}_5(\text{BF}_4)_3)$

Aqueous solution of NaOH (1 M, 0.48 mL) was added to the methanol solution (4 mL) of 3,5-bis(2-pyridyl)pyrazole (Hbpp, 0.48 mmol, 107 mg).  $\text{Co}(\text{CH}_3\text{COO})_2 \cdot 4\text{H}_2\text{O}$  (40 mmol, 100 mg) was then added to the reaction mixture and stirred at 40 °C for 10 minutes. A few drops of saturated aqueous  $\text{NaBF}_4$  solution was added to the reaction mixture, and a small portion of water was added to the solution. The solution was kept in a refrigerator for 1 h to generate a brown precipitate. The precipitate was collected by filtration, washed with water and dried under vacuum. The obtained precipitate was dissolved in acetonitrile and subjected to vapor diffusion in diethyl ether to afford brown crystals of  $[\text{Co}^{\text{II}}_5\text{OH}(\text{bpp})_6](\text{BF}_4)_3 \cdot 2\text{H}_2\text{O}$ . The crystals were collected by filtration and dried under vacuum. Yield 80 mg (52 %). Elemental analysis calcd. (%) for  $\text{C}_{78}\text{H}_{59}\text{Co}_5\text{F}_{12}\text{N}_{24}\text{O}_3\text{B}_3$ : C, 48.40; H, 3.07; N, 17.37. Found: C, 48.35; H, 3.13; N, 17.32.

(a)

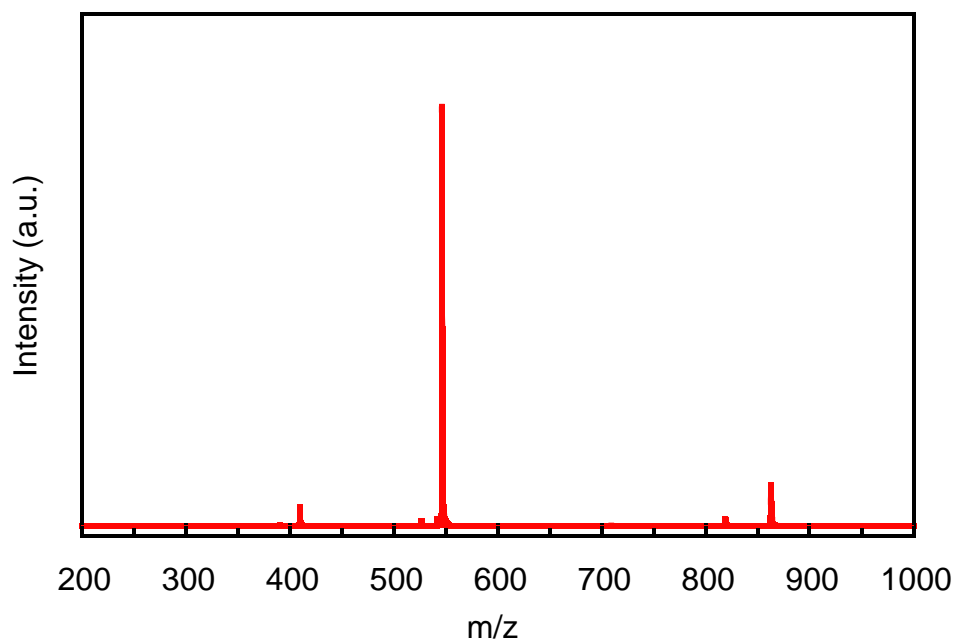

(b)

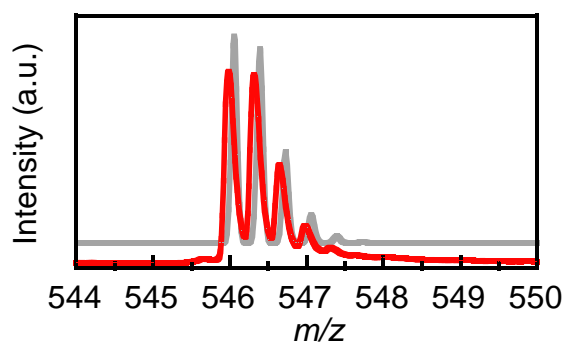

**Figure S1.** (a) An ESI-TOF mass spectrum of (a) **Co5** (b) An enlarged ESI-TOF mass spectrum of **Co5** (red line) and the simulated pattern for  $[\text{Co}_5\text{OH}(\text{bpp})_6]^{3+}$  (grey line). Analyses were carried out on a JEOL JMS-T100LP mass spectrometer.

### **X-ray Crystallography**

Data collection for **Co5** was performed at 123 K on a ROD, Synergy Custom system (Rigaku Oxford Diffraction) equipped with confocal monochromated Mo-K $\alpha$  radiation, and data were processed using CrysAlisPro 1.171.39.43c (Rigaku Oxford Diffraction). The structure were solved by direct methods using SIR-97 and refined by the full-matrix least squares techniques on  $F^2$  (SHELXL-2014/3). All nonhydrogen atoms were refined anisotropically and refined with a riding model with  $U_{\text{iso}}$  constrained to be 1.2 times  $U_{\text{eq}}$  of the carrier atom. Crystallographic data have been deposited with Cambridge Crystallographic Data Centre: CCDC deposition number; 1949862 for **Co<sub>5</sub>(BF<sub>4</sub>)<sub>3</sub>**. Copies of the data can be obtained free of charge via [www.ccdc.cam.ac.uk/data\\_request/cif](http://www.ccdc.cam.ac.uk/data_request/cif).

**Table S1.** Summary of crystallographic data for **Co5(BF<sub>4</sub>)<sub>3</sub>**.

|                          | [Co <sub>5</sub> OH(bpp) <sub>6</sub> ](BF <sub>4</sub> ) <sub>3</sub>                           |
|--------------------------|--------------------------------------------------------------------------------------------------|
| formula                  | C <sub>78</sub> H <sub>55</sub> B <sub>3</sub> Co <sub>5</sub> F <sub>12</sub> N <sub>24</sub> O |
| crystal system           | monoclinic                                                                                       |
| space group              | <i>P</i> 2 <sub>1</sub> / <i>n</i>                                                               |
| <i>a</i> /Å              | 15.2146(6)                                                                                       |
| <i>b</i> /Å              | 22.3485(8)                                                                                       |
| <i>c</i> /Å              | 26.8017(12)                                                                                      |
| <i>β</i> /°              | 102.122(4)                                                                                       |
| <i>V</i> /Å <sup>3</sup> | 8910.0(6)                                                                                        |
| <i>Z</i>                 | 4                                                                                                |
| <i>R</i> <sub>1</sub>    | 0.0720                                                                                           |
| <i>wR</i> <sub>2</sub>   | 0.2172                                                                                           |
| Goof                     | 1.027                                                                                            |



**Table S2.** Selected bond lengths of **Co5(BF<sub>4</sub>)<sub>3</sub>**.

|                               | <b>bond</b> | <b>length / Å</b> |
|-------------------------------|-------------|-------------------|
| $d(M_{\text{api}}\text{-N})$  | Co1-N1      | 2.198(5)          |
|                               | Co1-N2      | 2.108(5)          |
|                               | Co1-N5      | 2.186(5)          |
|                               | Co1-N6      | 2.103(4)          |
|                               | Co1-N9      | 2.182(5)          |
|                               | Co1-N10     | 2.104(4)          |
|                               | Co2-N13     | 2.195(5)          |
|                               | Co2-N14     | 2.100(5)          |
|                               | Co2-N17     | 2.175(5)          |
|                               | Co2-N18     | 2.118(5)          |
|                               | Co2-N21     | 2.195(5)          |
|                               | Co2-N22     | 2.120(5)          |
| <b>average</b>                |             | <b>2.149(5)</b>   |
| $d(M_{\text{core}}\text{-N})$ | Co3-N3      | 2.054(5)          |
|                               | Co3-N4      | 2.072(5)          |
|                               | Co3-N15     | 2.055(5)          |
|                               | Co3-N16     | 2.086(4)          |
|                               | Co4-N7      | 2.049(4)          |
|                               | Co4-N8      | 2.073(5)          |
|                               | Co4-N19     | 2.073(5)          |
|                               | Co4-N20     | 2.070(5)          |
|                               | Co5-N11     | 2.055(4)          |
|                               | Co5-N12     | 2.084(4)          |
|                               | Co5-N23     | 2.056(4)          |
|                               | Co5-N24     | 2.072(5)          |
| <b>average</b>                |             | <b>2.067(5)</b>   |
| $d(M_{\text{core}}\text{-O})$ | Co3-O1      | 1.997(4)          |
|                               | Co4-O1      | 2.017(4)          |
|                               | Co5-O1      | 2.014(4)          |
| <b>average</b>                |             | <b>2.009(4)</b>   |

**Table S3.** Selected angles of **Co5(BF<sub>4</sub>)<sub>3</sub>**.

|                | <b>bond</b> | <b>angle / deg</b> |
|----------------|-------------|--------------------|
| core angle     | Co3-O1-Co4  | 120.4(2)           |
|                | Co3-O1-Co5  | 120.3(2)           |
|                | Co4-O1-Co5  | 118.7(2)           |
| <b>average</b> |             | <b>119.8(2)</b>    |

## Electrochemical Measurements

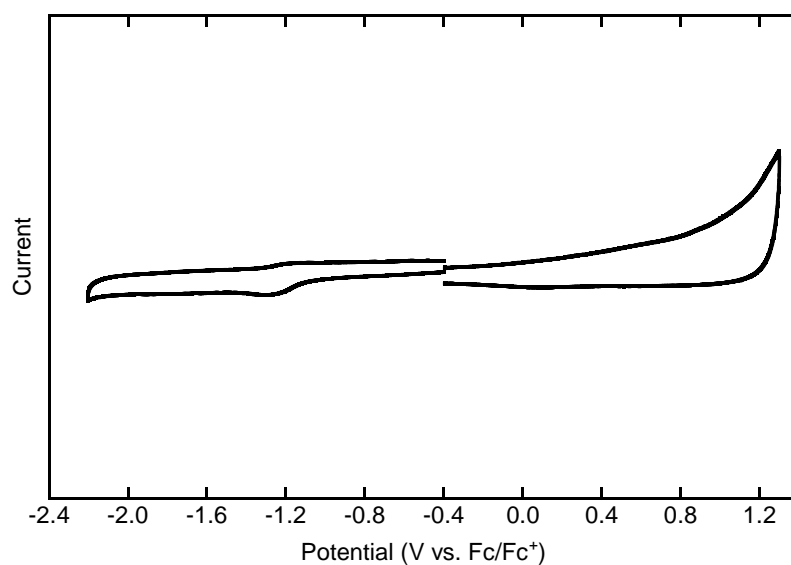

**Figure S2.** A cyclic voltammogram of a **Zn5** (0.2 mM) in an acetonitrile solution containing  $(n\text{-Bu})_4\text{NClO}_4$  (TBAP, 0.1 M) at a scan rate of 100 mV/s.

### Controlled Potential Electrolysis

Controlled Potential Electrolysis was performed in a gas-tight two-compartment electrochemical cell as in Figure S3. In the first compartment, the carbon plate working electrode and a leakless Ag/AgCl reference electrode (Innovative Instrument, Inc.) were immersed in 0.1 M TBAP/MeCN (5mL) containing **Co5** and trifluoroethanol. In the second compartment, the Pt auxiliary electrode was immersed in 0.1 M TBAP/MeCN (5 mL) containing ferrocene (40 mM) as a sacrificial reductant. The two compartments were separated by an anion exchange membrane (Selemon DSV). The solution was purged with CO<sub>2</sub> for 30 min prior to electrolysis. The electrolysis was performed for 1 h with constant stirring. The amount of CO and H<sub>2</sub> produced at the headspace of the cell was quantified by a Shimadzu GC-8A with a TCD detector equipped with a packed column with Molecular Sieve 13X-S 60/80 (He carrier gas, 40 °C) and a Shimadzu GC-2014 with a TCD detector equipped with a packed column with Molecular Sieve 5A (Ar carrier gas, 40 °C). Additionally, liquid product was quantified by using a Shimadzu LC-20AD with SPD-20A and RID-10A detectors equipped with a Shim-pack SCR102H column. Calibration curves were obtained by sampling known amounts of H<sub>2</sub>, CO, and HCOOH.

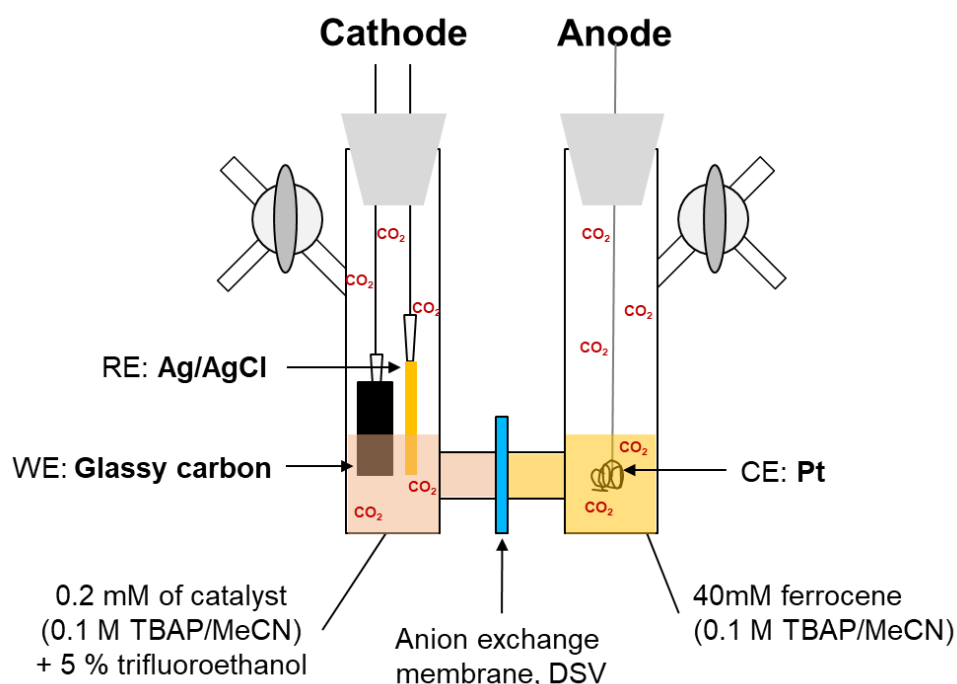

**Figure S3.** General setup for controlled-potential electrolysis performed in this work.

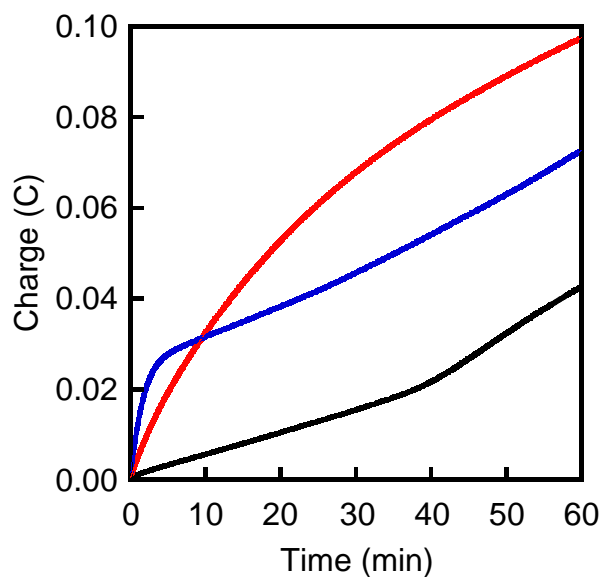

**Figure S4.** The results of CPE of 0.2 mM **Co5** (red line), **Co5** in the presence of 5 % trifluoroethanol (blue line) and in the absence of **Co5** (black line) in 0.1 M TBAP/MeCN under CO<sub>2</sub> at -2.5 V (vs. Fc/Fc<sup>+</sup>) for 1 h. The CPE experiments were carried out using a GC plate as a working electrode.

**Table S4.** Summary of CPE experiments.<sup>a</sup>

| No. | Catalyst   | TFE (%) | Charge (C) | CO (μmol) | H <sub>2</sub> (μmol) | HCOOH (μmol) |
|-----|------------|---------|------------|-----------|-----------------------|--------------|
| 1   | <b>Co5</b> | 5       | 0.073      | 0.11      | 0.19                  | 0.08         |
| 2   | <b>Co5</b> | -       | 0.098      | 0.09      | 0.05                  | 0.22         |
| 3   | -          | -       | 0.043      | 0         | 0.01                  | 0            |

[a] Conditions: 0.2 mM **Co5**, applied voltage: -2.5 V (vs. Fc/Fc<sup>+</sup>), duration: 1 h.

## Photocatalytic Experiment

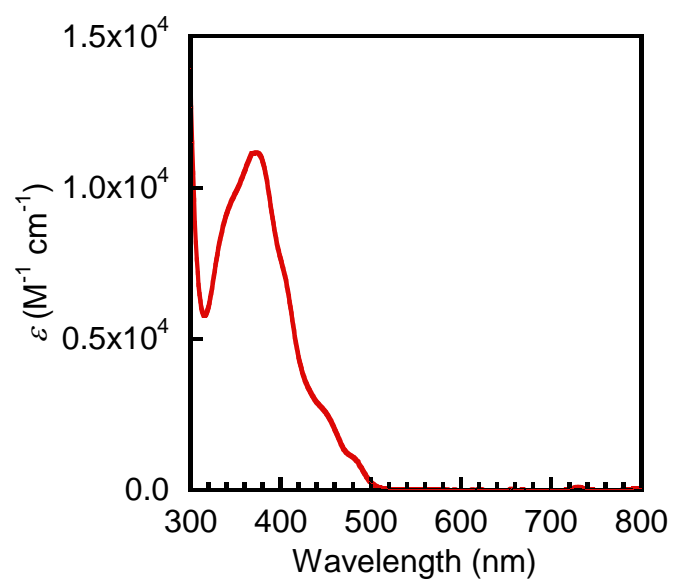

**Figure S5.** The absorption spectrum 30  $\mu\text{M}$  Ir(ppy)<sub>3</sub> in acetonitrile.

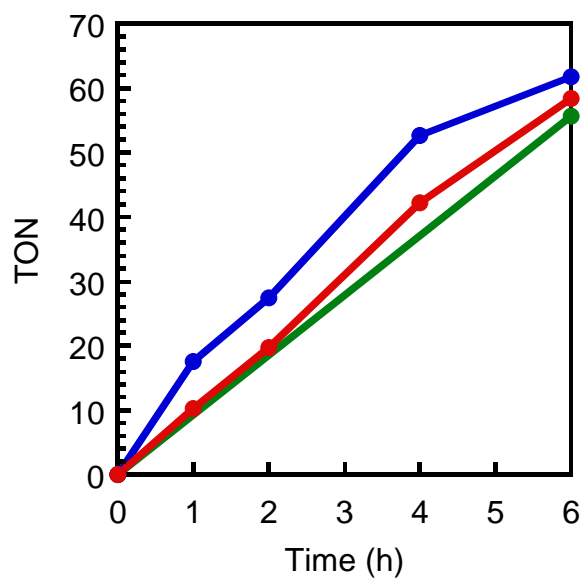

**Figure S6.** Photocatalytic production of CO (red line), H<sub>2</sub> (blue line) and HCOOH (green line) in a CO<sub>2</sub>-saturated DMA/TFE (17:3, v/v) solution containing 1  $\mu$ M **Co5**, 150  $\mu$ M Ir(ppy)<sub>3</sub> and 0.1 M BIH under visible-light irradiation (225 W Xe lamp equipped with 420 nm long pass filter (Edmund Industrial Optics) and CM-1 cold mirror, wavelength  $420 \leq \lambda \leq 750$  nm).

## Reference

1. D. Hong, Y. Tsukakoshi, H. Kotani, T. Ishizuka and T. Kojima, *J. Am. Chem. Soc.*, 2017, **139**, 6538.
2. J.-Z. Hou, M. Li, Z. Li, S.-Z. Zhan, X.-C. Huang, and D. Li, *Angew. Chem. Int. Ed.*, 2008, **47**, 1711.
3. S. Romain, J. Rich, C. Sens, T. Stoll, J. Benet-Buchholz, A. Llobet, M. Rodriguez, I. Romero, R. Clérac, C. Mathonière, C. Duboc, A. Deronzier, and M.-N. Collomb, *Inorg. Chem.* 2011, **50**, 8427.
